# Supplementary material for: Aescin Protects against Experimental Benign Prostatic Hyperplasia and Preserves Prostate Histomorphology in Rats via Suppression of Inflammatory Cytokines and COX-2
Source: MDPI journal article supplement (doi:10.3390/ph15020130), 2022-01-22
Supplement: s1 [file s1]

### Data Analysis:

Since all data sets passed the D'Agostino & Pearson test for normality or lognormality, the correlation between the measured parameters was determined by calculation of the parametric Pearson correlation coefficient,  $r$ . The correlation is weak when  $r < |0.3|$ , moderate when  $|0.3| \leq r \leq |0.7|$ , and strong when  $r > |0.7|$ .

### Correlation analysis of the measured parameters

Data in Figure 8 illustrate the relationship between the results of the current study in the form of a correlation matrix showing the Pearson's correlation coefficient between the measured parameters. The data show that serum testosterone level has a strong positive correlation with the prostate proliferation (prostate weight, prostate weight index, epithelial thickness, PCNA, and TGF- $\beta$ ) and inflammation (IL-1 $\beta$ , TNF- $\alpha$ , and COX-2) parameters, and negative moderate correlation with serum LH. Of note, the tissue levels of either TNF- $\alpha$  and TGF- $\beta$  show strong positive correlation among themselves and between either of them and the prostate expression of either PCNA or COX-2. Serum LH is moderately negatively correlated with all the studied parameters.

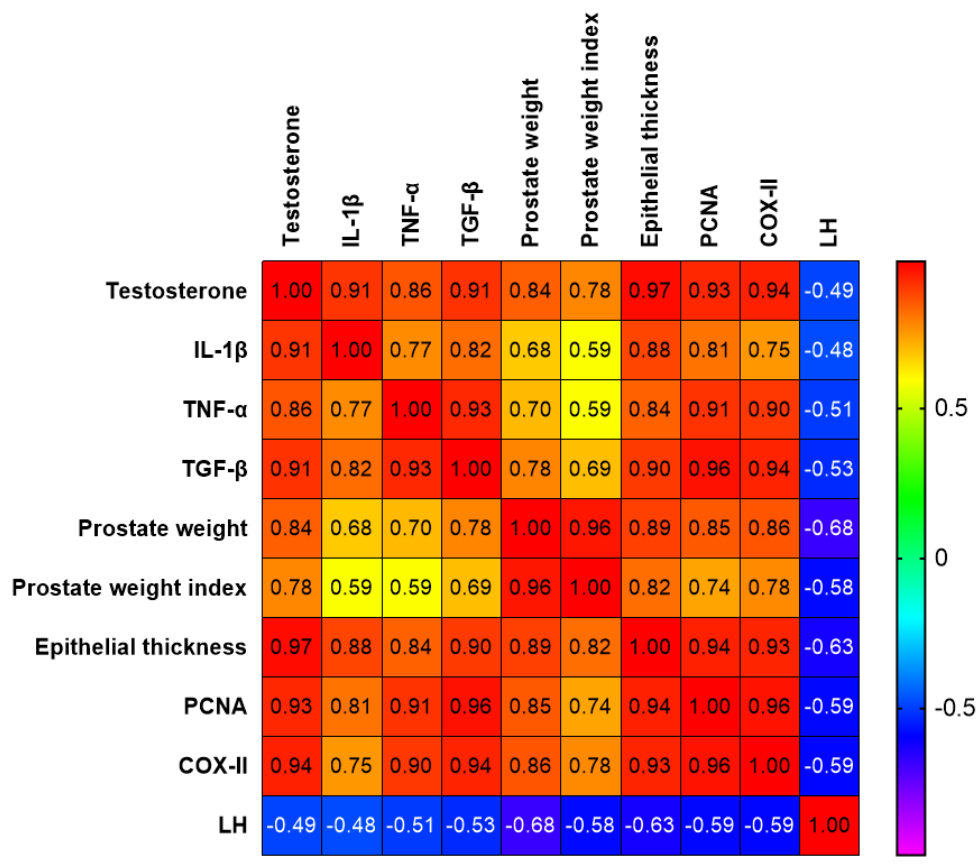

**Figure S1.** Correlation matrix between the study parameters. Data from different experiments were analyzed for correlation using the Pearson correlation coefficient ( $r$ ). Positive values indicate a positive correlation while negative values indicate a negative one. When  $r$  is in the range of  $|0.3|$ – $|0.7|$ , this indicates a moderate correlation, and when  $r > |0.7|$ , this means a strong correlation. The graph is rainbow-color-coded so that the red and violet colors indicate  $r$  values of +1 and -1, respectively, see the scale bar to the right. IL-1 $\beta$ : interleukin-1 $\beta$ ; TNF- $\alpha$ : tumor necrosis factor  $\alpha$ ; TGF $\beta$ : transforming growth factor  $\beta$ ; Prostate weight index was calculated as prostate weight (mg) divided by the body weight (g); PCNA: proliferating cell nuclear antigen; COX-2: cyclooxygenase-2; LH: luteinizing hormone.
